# Supplementary material
Source: PubMed Central journal article supplement (PMC5228201)
Supplement: NIHMS838074-supplement-Supplementary_Content.pdf [file NIHMS838074-supplement-Supplementary_Content.pdf]

## Supplementary Online Content

Gupta S, Halm EA, Rockey DC, et al. Comparative effectiveness of fecal immunochemical test outreach, colonoscopy outreach, and usual care for boosting colorectal cancer screening among the underserved: a randomized trial. *JAMA Intern Med.* doi:10.1001/jamainternmed.2013.9294.

### **eTable 1.** Characteristics of Patients With CRC Detected

This supplementary material has been provided by the authors to give readers additional information about their work.

**eTable1. Characteristics of patients with CRC detected**

| <b>GROUP</b>                | <b>TNM STAGE</b> | <b>LOCATION</b>    | <b>SCREEN DETECTED YES/NO*</b> | <b>DETECTED 2<sup>0</sup> TO INTERVENTION YES/NO**</b> |
|-----------------------------|------------------|--------------------|--------------------------------|--------------------------------------------------------|
| <b>Colonoscopy Outreach</b> | Stage I          | Sigmoid Colon      | Yes                            | Yes                                                    |
|                             | Stage I          | Ascending Colon    | No                             | No                                                     |
| <b>FIT Outreach</b>         | Stage 0          | Appendix           | Yes                            | Yes                                                    |
|                             | Stage I          | Cecum              | Yes                            | Yes                                                    |
|                             | Stage IIIA       | Splenic Flexure    | Yes                            | Yes                                                    |
|                             | Stage 0          | Ascending Colon    | No                             | No                                                     |
|                             | Stage IV         | Rectosigmoid Colon | No                             | No                                                     |
|                             | Unknown          | Sigmoid Colon      | No                             | No                                                     |
| <b>Usual Care</b>           | Stage 0          | Sigmoid Colon      | Yes                            | No                                                     |
|                             | Stage 0          | Sigmoid Colon      | Yes                            | No                                                     |
|                             | Stage I          | Ascending Colon    | No                             | No                                                     |
|                             | Stage I          | Rectosigmoid Colon | No                             | No                                                     |
|                             | Stage IIA        | Rectum             | No                             | No                                                     |
|                             | Stage IV         | Splenic Flexure    | No                             | No                                                     |

\*Refers to whether the colorectal cancer was diagnosed after presentation with signs/symptoms of cancer, or as a result of asymptomatic screening; \*\*Refers to whether the cancer was detected as a result of asymptomatic screening that was initiated by our FIT or colonoscopy outreach interventions.
